# Supplementary material for: Modelling the developmental spliceosomal craniofacial disorder Burn-McKeown syndrome using induced pluripotent stem cells
Source: PubMed Central journal article supplement (PMC7394406; doi:10.1371/journal.pone.0233582), 2020-07-31
Supplement: pone.0233582.s003.pdf [file pone.0233582.s003.pdf]

## Supporting Information

### **Modelling the developmental spliceosomal craniofacial disorder Burn-McKeown syndrome using induced pluripotent stem cells**

*Katherine A. Wood<sup>1,2</sup>, Charlie F. Rowlands<sup>1,2</sup>, Huw B. Thomas<sup>1</sup>, Steven Woods<sup>3</sup>, Julieta O'Flaherty<sup>3</sup>, Sofia Douzgou<sup>1,2</sup>, Susan J. Kimber<sup>3</sup>, William G. Newman<sup>1,2\*</sup>, Raymond T. O'Keefe<sup>1\*</sup>*

<sup>1</sup>Division of Evolution and Genomic Sciences, School of Biological Sciences, Faculty of Biology, Medicine and Health, The University of Manchester, UK

<sup>2</sup>Manchester Centre for Genomic Medicine, Manchester University NHS Foundation Trust, Manchester Academic Health Science Centre, Manchester, UK

<sup>3</sup>Division of Cell Matrix Biology and Regenerative Medicine, School of Biology, Faculty of Biology, Medicine and Health, University of Manchester, Manchester, UK

\*To whom correspondence should be addressed.

Email: [william.newman@manchester.ac.uk](mailto:william.newman@manchester.ac.uk); [rokeefe@manchester.ac.uk](mailto:rokeefe@manchester.ac.uk)

# SUPPLEMENTARY FIGURES S1– S10

## S1 FIG

**A**

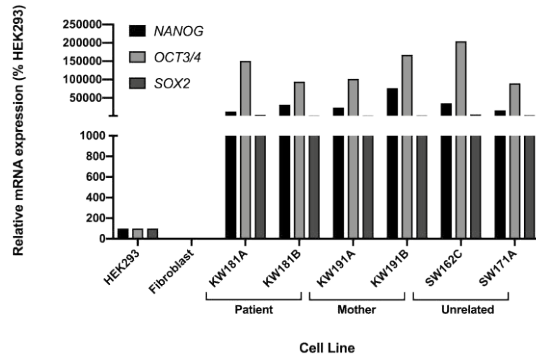

**B**

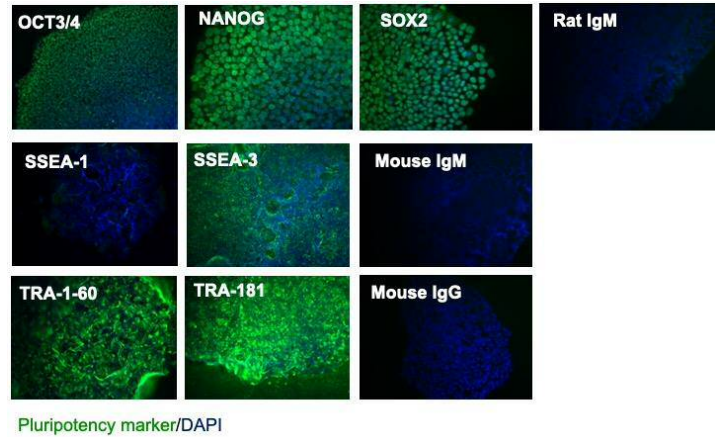

**C**

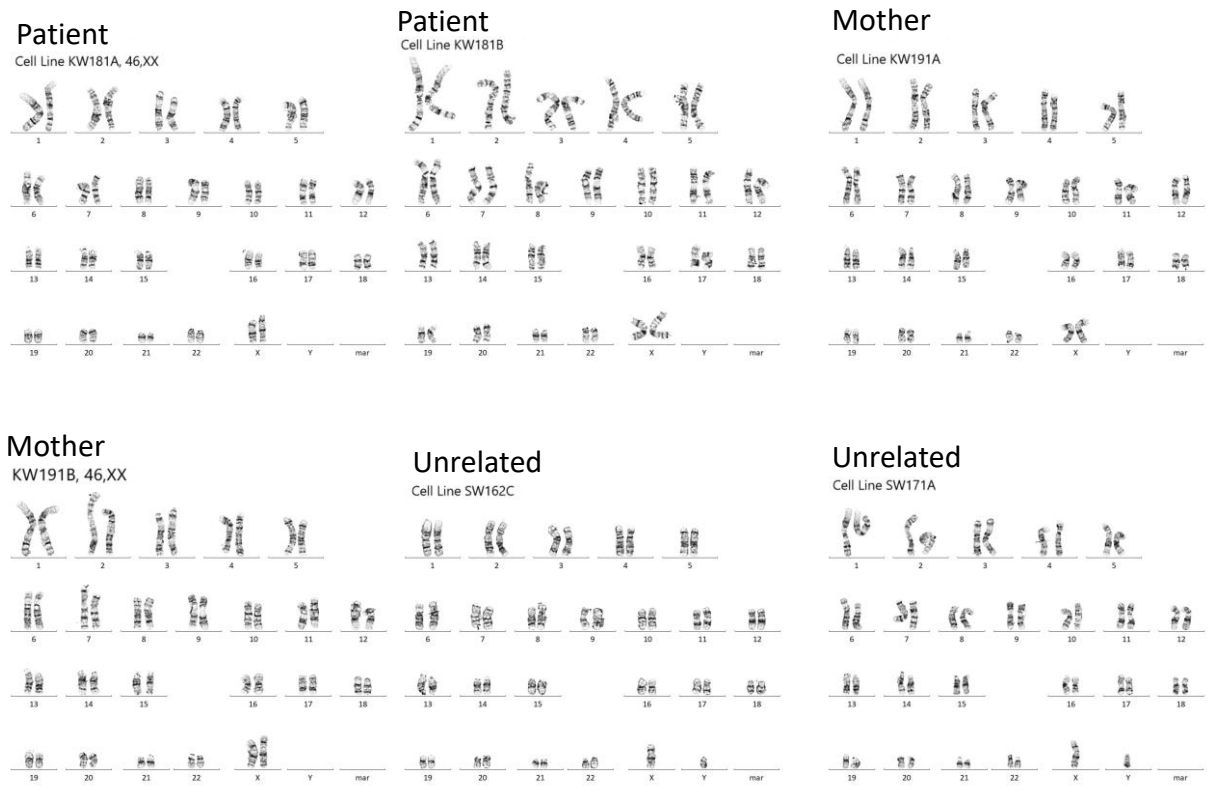

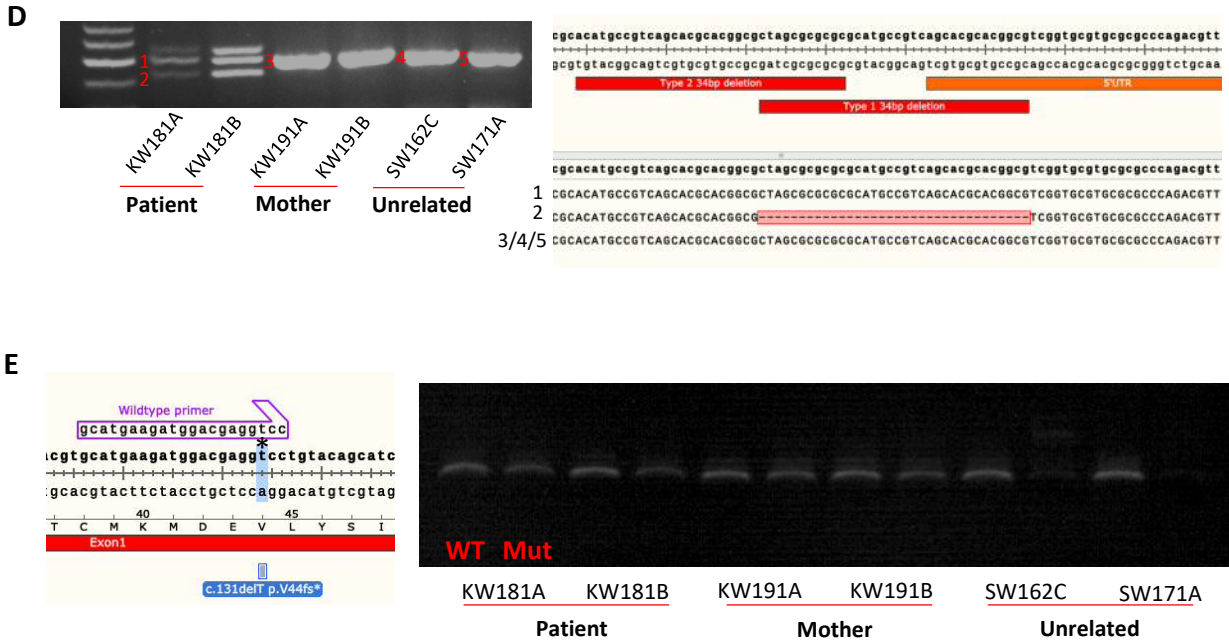

**S1 Fig:** Characteristics of iPSCs. A) Relative pluripotency marker gene (*OCT3/4*, *SOX2*, *NANOG*) mRNA expression levels in iPSC lines (KW181A, KW181B, KW191A, KW191B, SW162C, SW171A) compared to HEK293 cells and fibroblasts, determined using qPCR of cDNA from each cell line. Graphs were obtained using the  $\Delta\Delta C_T$  method with *ACTB* as the endogenous reference gene. B) Immunofluorescence staining for pluripotency markers. Representative positive immunofluorescence staining in SW171A iPSCs for pluripotency markers OCT3/4, SOX2, NANOG, SSEA-3, TRA-1-60 and TRA-1-81 (green), and negative immunofluorescence staining for the early differentiation marker SSEA-1, and DAPI nuclear staining shown in blue. Isotype controls for rat IgM, mouse IgM and mouse IgG are also presented. C) Karyograms for all six iPSC lines used in this study showing normal karyotypes in all cases. D) Genotyping of type 1 34bp *TXNL4A* promoter deletion in patient (KW181A and KW181B), mother (KW191A and KW191B) and unrelated control (SW162C and SW171A) iPSC lines by PCR with genomic DNA extracted from cell lines and primers proximal to the deleted region in the *TXNL4A* promoter. PCR products were separated by agarose gel electrophoresis and purified, and the identities confirmed by Sanger sequences as shown. The highest molecular weight (MW) band in the patient did not sequence. E) Genotyping of the chr18: g.77,748,262delA, RefSeq NM\_006701.2; c.131delT (p.Val44Alafs\*48) (GRCh37/hg19) (exon 1, 1bp deletion) in iPSC lines. Genomic DNA extracted from the cell lines was amplified in two PCR reactions, one with the wildtype forward primer as shown and one with a mutant forward primer with the 't' base indicated by a \* deleted. PCR products were separated by agarose gel electrophoresis. Cell lines heterozygous for the mutation amplify with both primer sets while cell lines homozygous for the wildtype sequence or the mutant sequence only amplify with the wildtype or mutant primer set respectively.

**S2 FIG**

**A**

**Enriched Canonical Pathways**

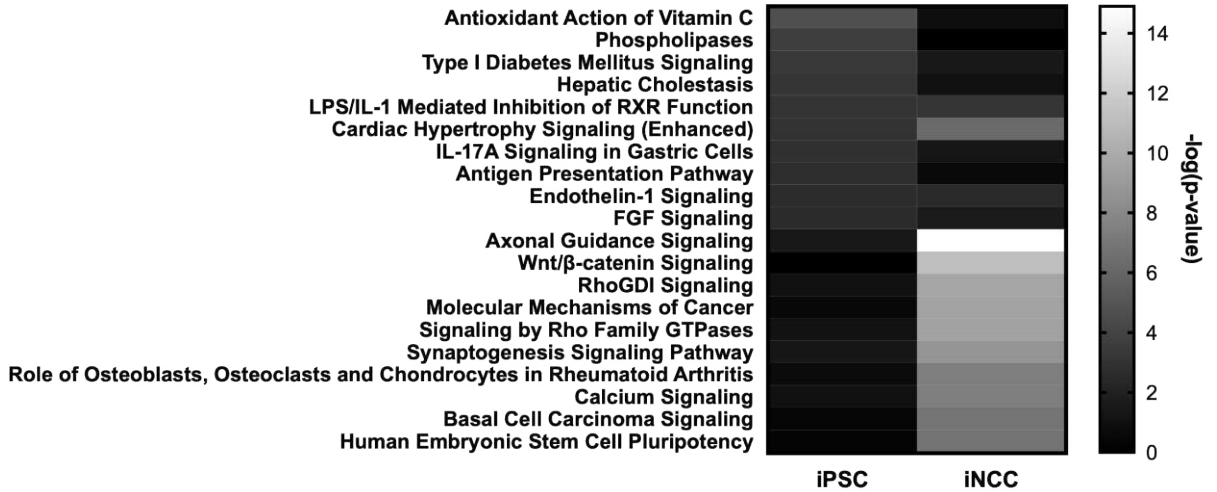

**B**

**Enriched Upstream Regulators**

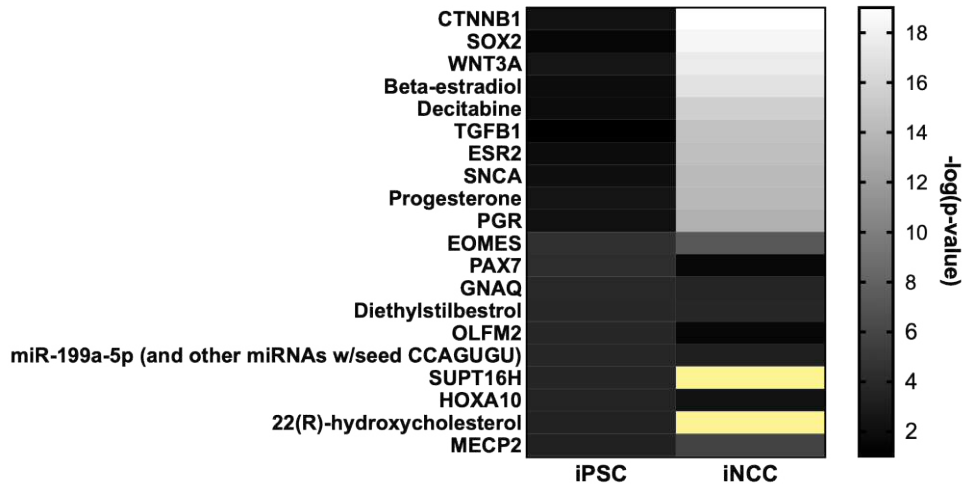

C

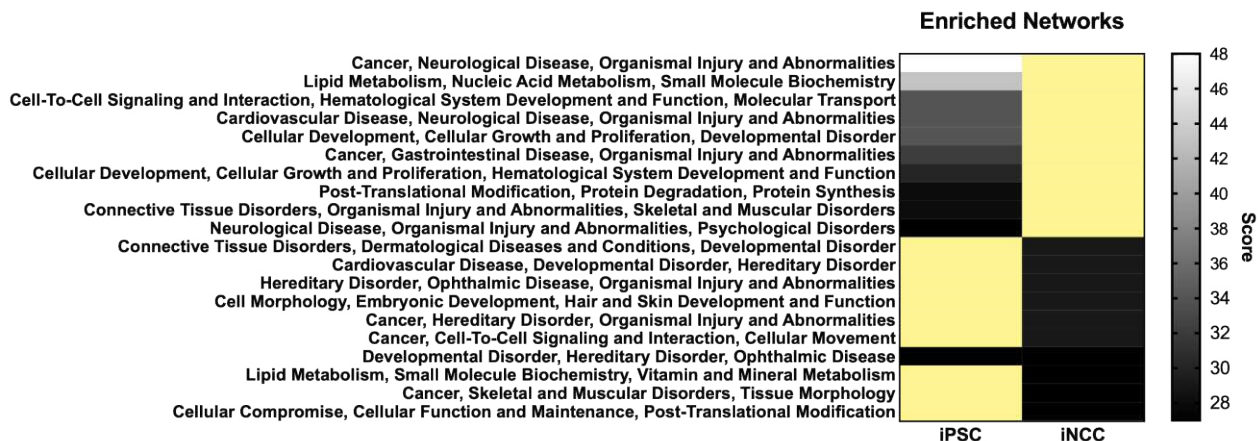

D

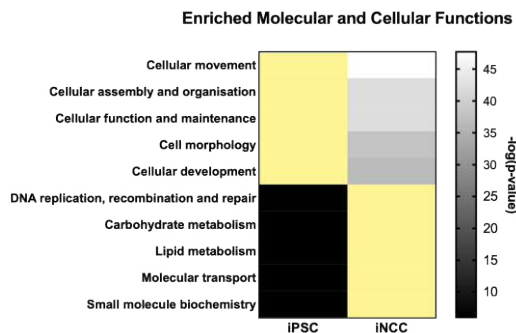

E

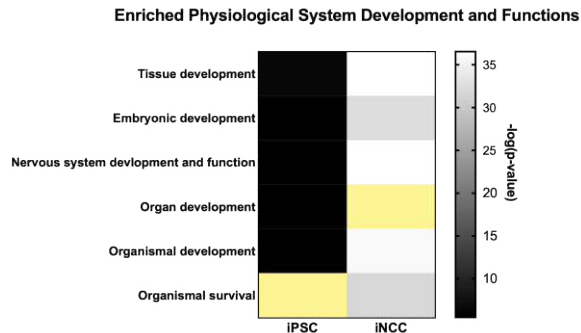

**S2 Fig:** Top enriched A) canonical pathways, B) networks, C) upstream regulators, D) molecular and cellular functions, E) physiological system development and functions, associated with the differentially expressed genes (DEGs) in pooled patient iPSCs or iNCCs compared to pooled maternal and unrelated control iPSCs or iNCCs, obtained using IPA. Pale yellow indicates no enrichment for the particular term in that cell line.

### S3 FIG

A

#### UPRT novel exon inclusion (E2-E3 primers)

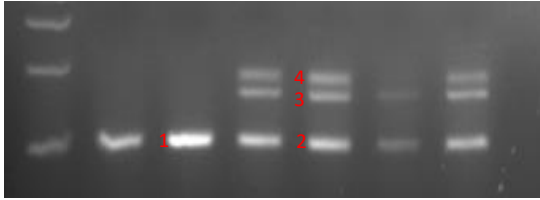

KW181A KW181B KW191A KW191B SW162C SW171A  
Patient Mother Unrelated

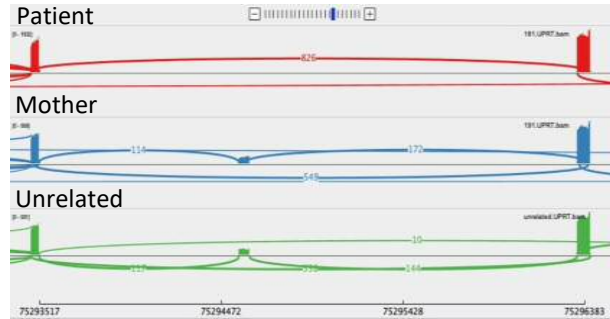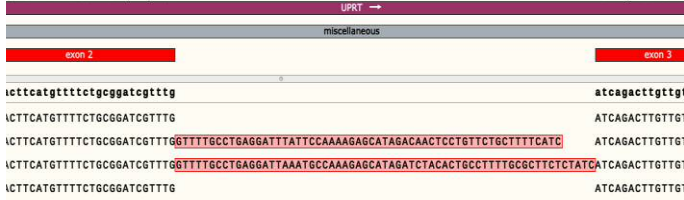

B

#### ZNF185 exon 15 skipping (E14-E16 primers)

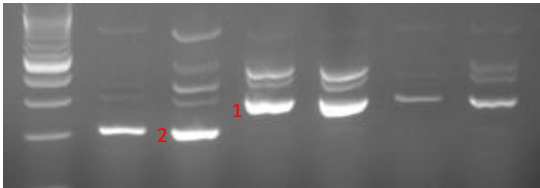

KW181A KW181B KW191A KW191B SW162C SW171A  
Patient Mother Unrelated

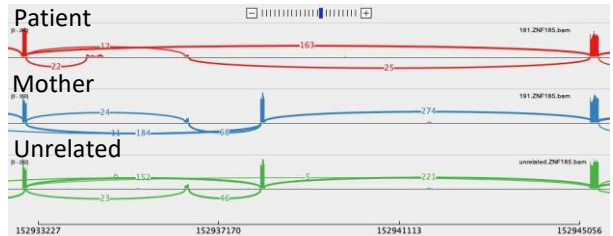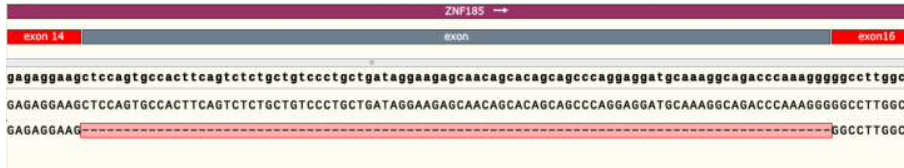

**S3 Fig:** Validation of alternative splicing events in A) *UPRT* and B) *ZNF185* as identified by rMATS in patient iPSCs (KW181A, KW181B) compared to mother (KW191A, KW191B) and unrelated control (SW162C, SW171A) iPSCs. For both genes, Sashimi plots identified inclusion of an exon in mother and unrelated iPSC lines not apparent in patient lines. RT-PCR reactions were performed using primers targeting the exons flanking the novel exons with cDNA generated from the RNA extracted from iPSCs and used in RNA-Seq experiments. PCR products were separated by agarose gel electrophoresis, and the products indicated by red numbers were purified and the corresponding sequences (confirmed by Sanger sequencing) are shown below.

**S4 FIG**

**A**

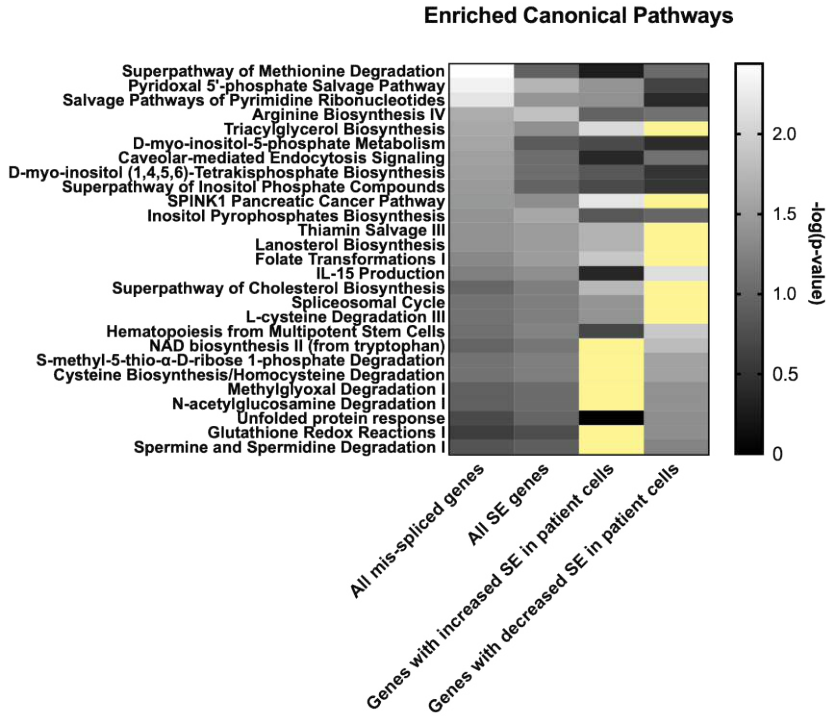

**B**

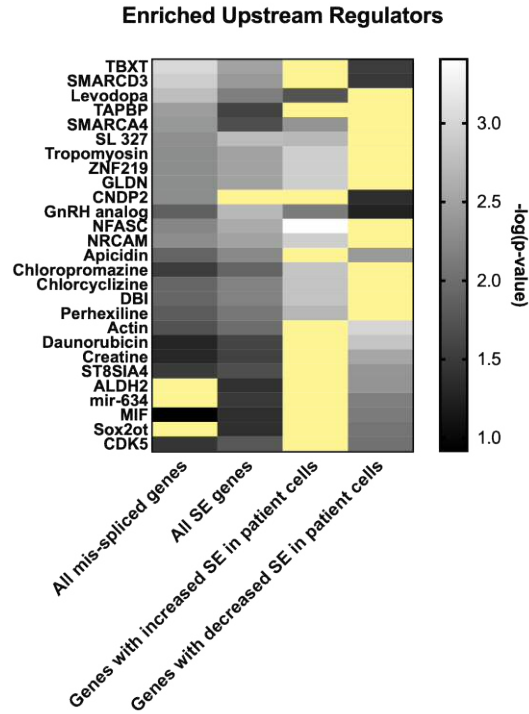

C

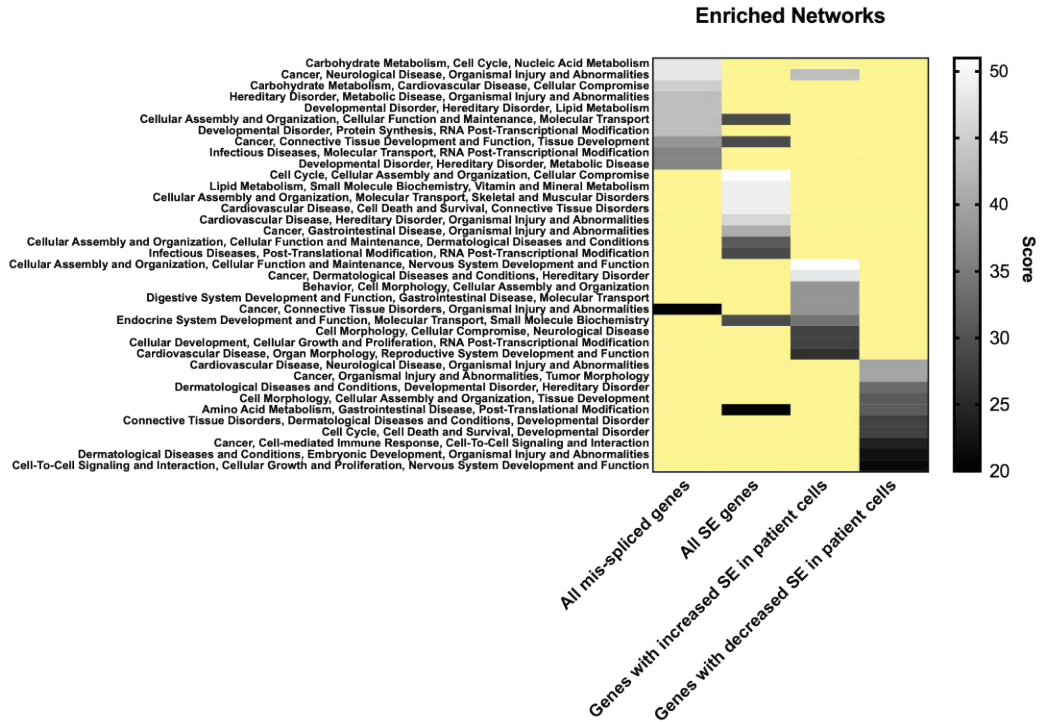

D

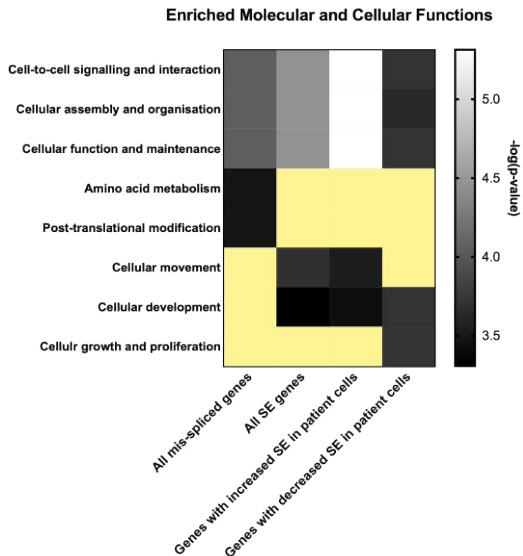

E

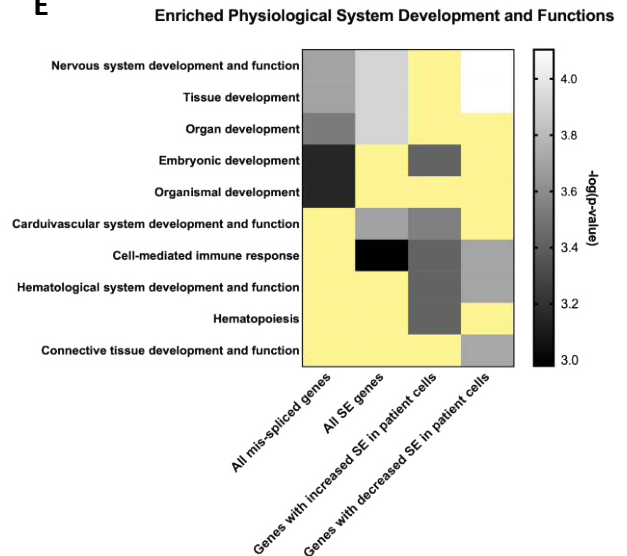

**S4 Fig:** Top enriched A) canonical pathways, B) networks, C) upstream regulators, D) molecular and cellular functions, E) physiological system development and functions, associated with all the mis-spliced genes in pooled patient iPSCs compared to pooled maternal and unrelated control iPSCs, all genes showing altered exon skipping (SE) in pooled patient iPSCs compared to pooled maternal and unrelated control iPSCs, genes showing increased SE and genes showing decreased SE in pooled patient iPSCs compared to pooled maternal and unrelated control iPSCs, obtained using IPA. Pale yellow indicates no enrichment for the particular term in that cell line.



## S5 FIG

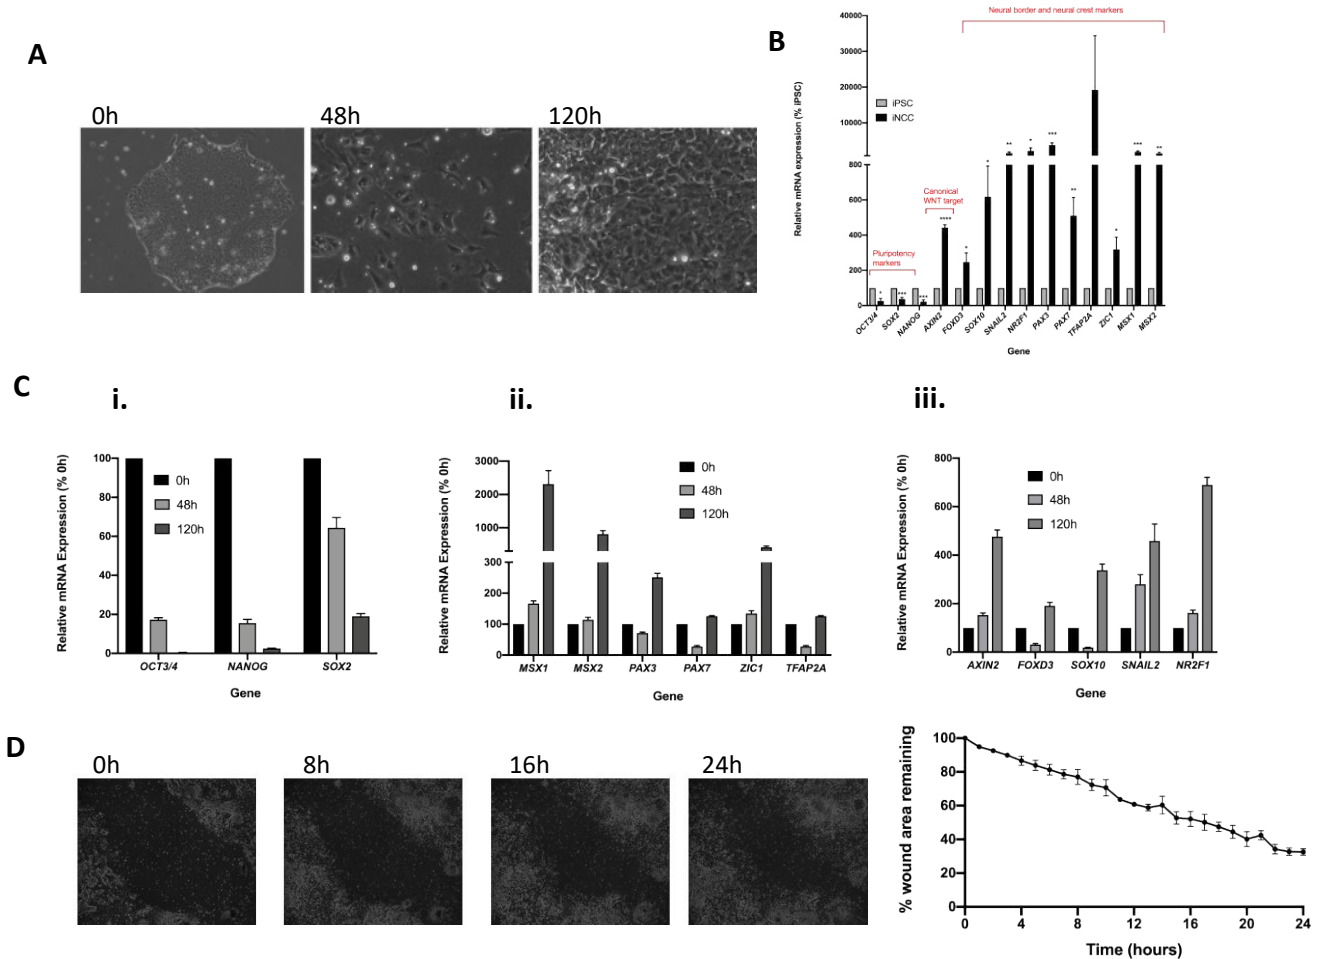

**S5 Fig:** Differentiation of SW171A control iPSCs to iNCCs. A) Key stages in differentiation of SW171A unrelated control iPSCs to iNCCs. Phase contrast microscopy showing the changing morphology of cells at time points 0h, 48h and 120h in the differentiation protocol described by Leung et al., (2016). B) Key marker gene expression in SW171A cells pre- and post-differentiation to iNCCs, obtained by qPCR on cDNA generated from RNA isolated from the cells at 0h and 120h of the protocol. Relative gene expression was calculated using the  $\Delta\Delta C_T$  method with *ACTB* as a stable endogenous reference gene.  $n = 4$ . C) Expression of i) key pluripotency marker genes, ii) neural border and iii) *AXIN2* and neural crest marker genes in SW171A control cells at 0h, 48h and 120h during the differentiation protocol, obtained by qPCR on cDNA generated from RNA isolated from the cells at the specified time points. Relative gene expression was calculated using the  $\Delta\Delta C_T$  method with *ACTB* as a stable endogenous reference gene.  $n = 3$ . D) Migration of differentiated SW171A iNCCs determined using a wound healing assay. Representative phase-contrast images taken immediately and at 8h, 16h and 24h after wounding. The wound area at each time point was calculated using the MRI wound healing plugin in the Fiji image analysis tool.  $n = 2$ .

**S6 FIG**

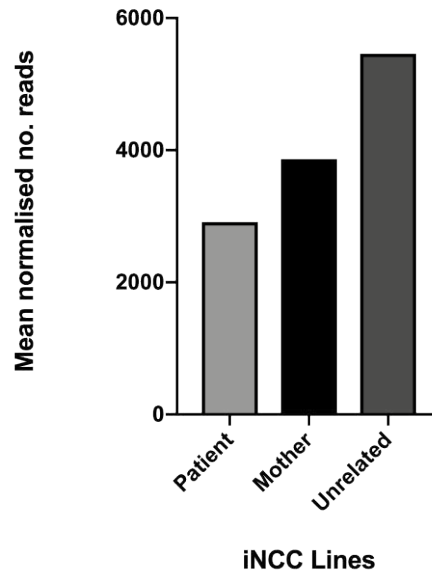

**S6 Fig:** Mean normalised read counts for *TXNL4A* in pooled patient, mother and unrelated control iNCCs from RNA-Seq data from iNCCs.

## S7 FIG

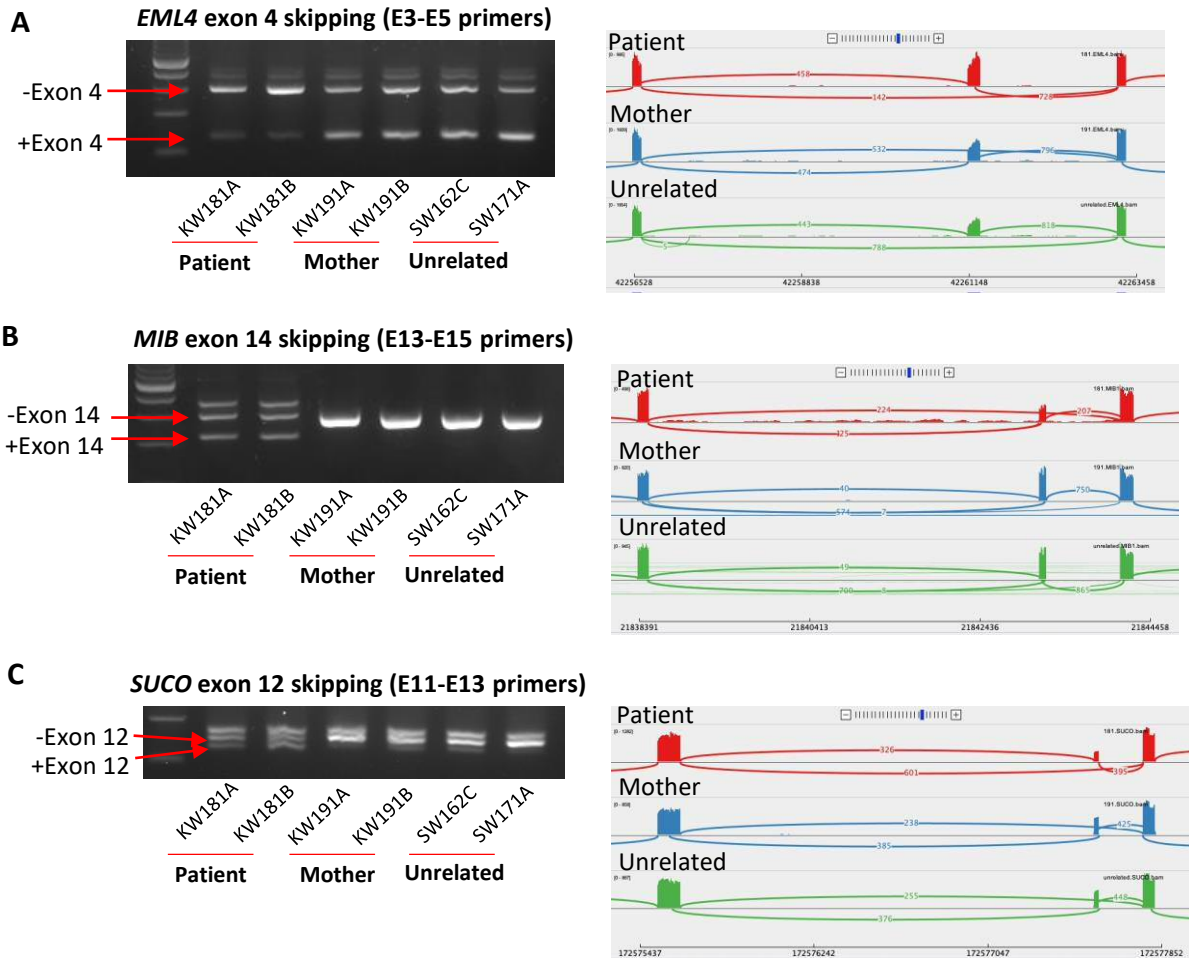

**S7 Fig:** Validation of alternative splicing events in A) *EML4*, B) *MIB* and C) *SUCO* as identified by rMATS in pooled patient (KW181A and KW181B) iNCCs compared to pooled mother (KW191A and KW191B) and unrelated control (SW162C and SW171A) iNCCs. For all genes, Sashimi plots identified altered splicing events. RT-PCR reactions were performed using primers targeting the exons flanking the novel exons with cDNA generated from the RNA extracted from iNCCs and used in RNA-Seq experiments. PCR products were separated by agarose gel electrophoresis

**S8 FIG**

**A**

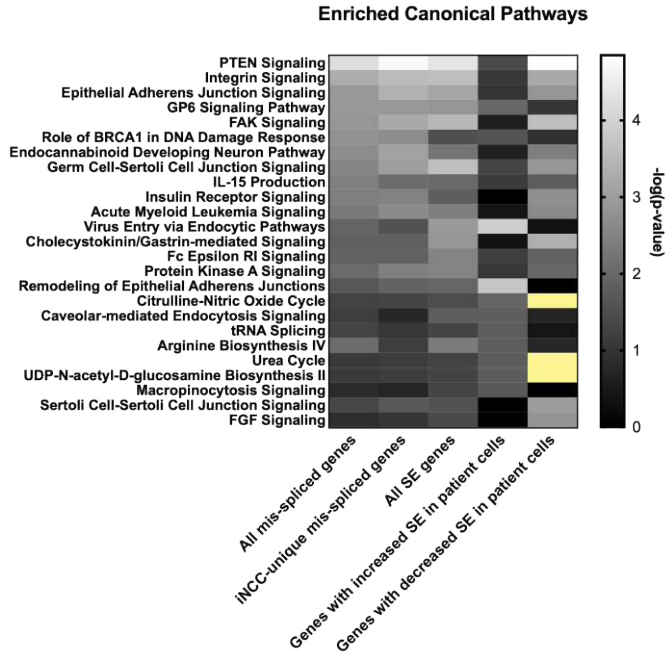

**B**

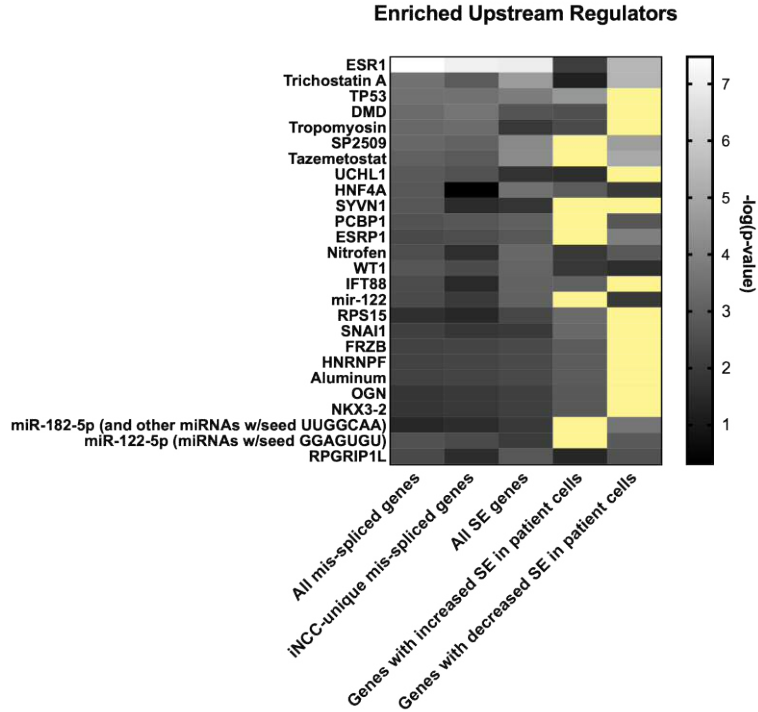

## Enriched Networks

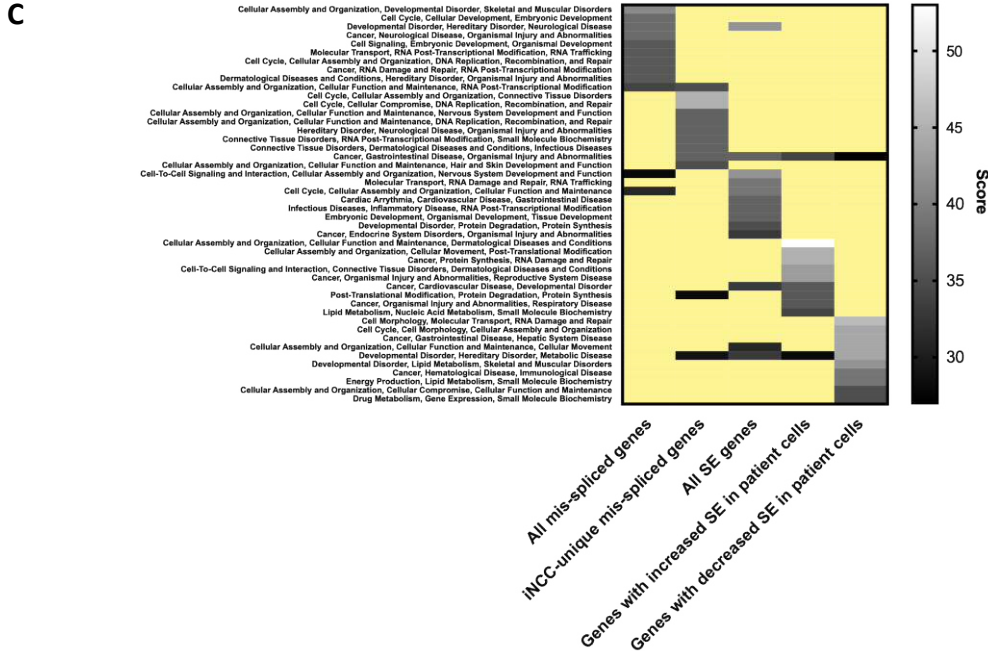

**D**

## Enriched Molecular and Cellular Functions

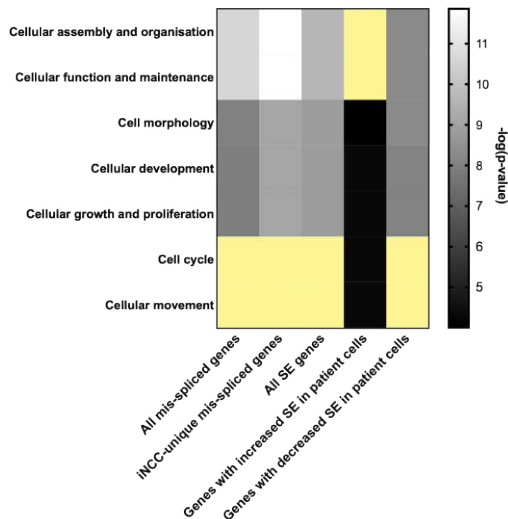

**E**

## Enriched Physiological System Development and Functions

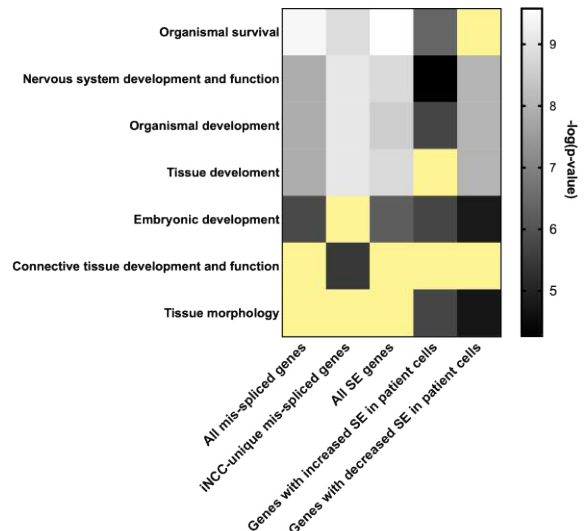

**S8 Fig:** Top enriched A) canonical pathways, B) networks, C) upstream regulators, D) molecular and cellular functions, E) physiological system development and functions, associated with all the mis-spliced genes in pooled patient iPSCs compared to pooled maternal and unrelated control iNCCs, all the genes which are uniquely mis-spliced between patient and pooled maternal and control cells in the iNCC RNA-Seq data and not in the iPSC RNA-Seq data, all genes showing altered exon skipping (SE) in pooled patient iNCCs compared to pooled maternal and unrelated control iNCCs, genes showing increased SE and genes showing decreased SE in pooled patient iNCCs compared to pooled maternal and unrelated control iNCCs, obtained using IPA. Pale yellow indicates no enrichment for the particular term in that cell line.

## S9 FIG

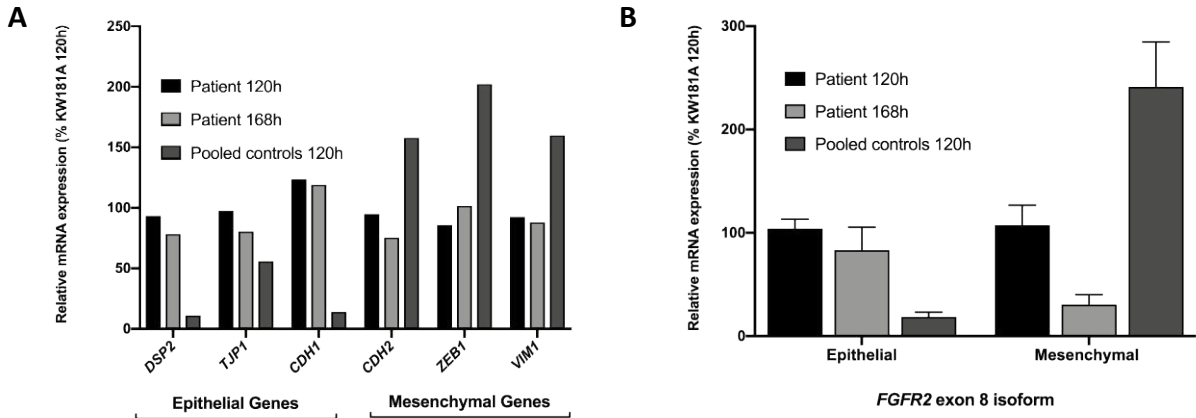

**S9 Fig:** EMT marker gene expression and *FGFR2* splicing following an extended differentiation period. A) epithelial and mesenchymal marker gene expression and B) *FGFR2* exon 8 splicing in 120h and 168h differentiated patient cells compared to 120h mother and unrelated (pooled control) cells, obtained using qPCR. qPCR experiments were performed on cDNA generated from RNA isolated from cell lines at the time points indicated. Relative gene expression was calculated using the  $\Delta\Delta C_T$  method with *ACTB* as a stable endogenous reference gene. n = 2.

# S10 FIG

**A**

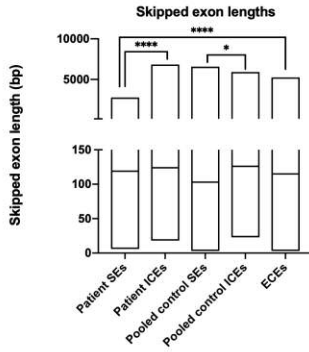

**B**

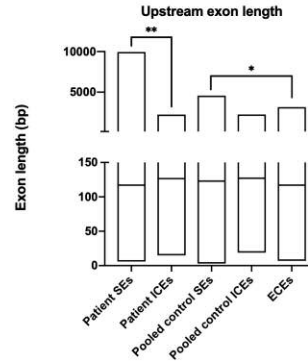

**C**

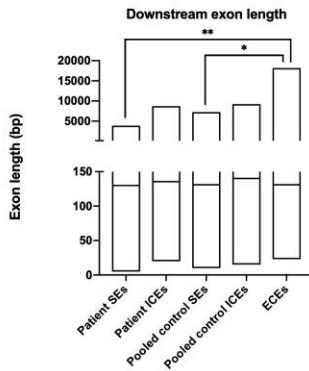

**D**

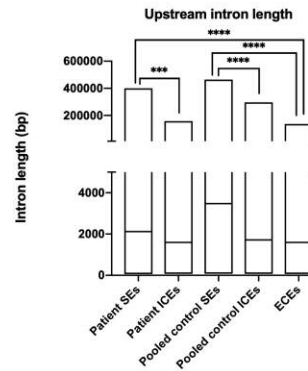

**E**

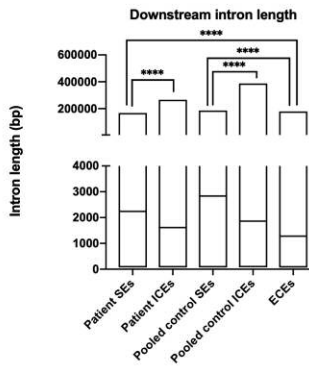

**F**

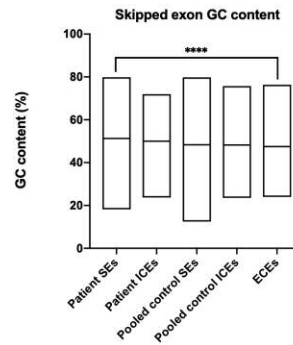

**G**

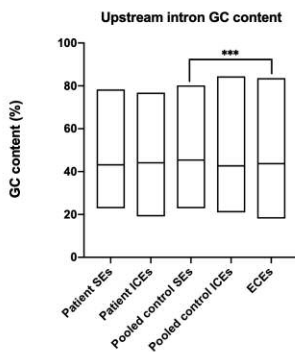

**H**

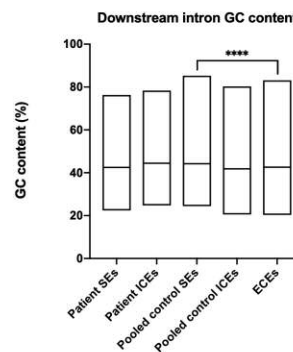

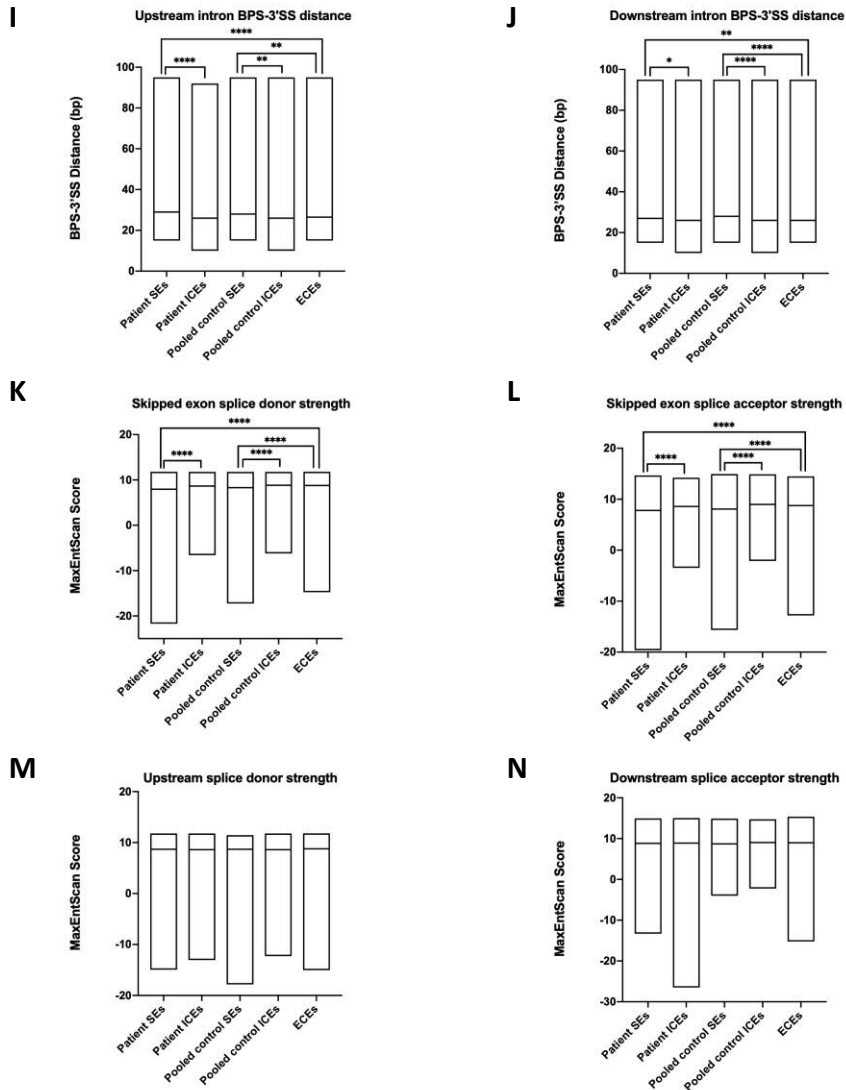

**S10 Fig:** Physical properties of exons more skipped (patient SE) in pooled patient iNCCs and exons less skipped (pooled control SE) in pooled patient iNCCs compared to pooled mother and unrelated control iNCCs as determined by rMATS. Physical properties were compared to internal control exons (ICEs) from the same gene containing the differential SE event, and to external control exons (ECEs) from highly expressed but not differentially spliced genes between patient and pooled control iNCCs in the RNA-Seq dataset. Properties investigated for both types of skipped exon were: A) skipped exon lengths; B) upstream exon lengths; C) downstream exon lengths; D) upstream intron lengths; E) downstream intron lengths; F) skipped exon GC content; G) upstream intron GC content; H) downstream intron GC content; I) upstream intron branch point to 3' splice site (BPS-3'SS) distance; J) downstream intron BPS-3'SS distance; K) skipped exon splice donor strengths; L) skipped exon splice acceptor strengths; M) upstream splice donor strengths; N) downstream splice donor strengths. \* p-value < 0.05, \*\* p-value < 0.01, \*\*\* p-value < 0.001, \*\*\*\* p-value < 0.0001.



**SUPPLEMENTARY TABLES S1 – S7**

| <b>Primer function</b> | <b>Target</b>                          | <b>Forward primer sequence (5' – 3')</b> | <b>Reverse primer sequence (5' – 3')</b> |
|------------------------|----------------------------------------|------------------------------------------|------------------------------------------|
| Genotyping             | <i>TXNL4A</i> promoter deletion region | GACAGCTGCTATGACGGAACC                    | CAAACCTCCGCTGGGACTGC                     |
| Genotyping             | <i>TXNL4A</i> E1 1bp deletion (WT)     | GCATGAAGATGGACGAGGTCC                    | TCCTCGGGGAACAGCTCG                       |
| Genotyping             | <i>TXNL4A</i> E1 1bp deletion (Mut)    | GCATGAAGATGGACGAGGCC                     | TCCTCGGGGAACAGCTCG                       |
| qPCR                   | <i>ACTB</i>                            | GTGGATCAGCAAGCAGGAGT                     | GTAACAACGCATCTCATATTTGGAA                |
| qPCR                   | <i>TXNL4A</i>                          | GGACTGGCAACAACAACAAGA                    | AGCGGTACTTGGTGGAGTAGT                    |
| qPCR                   | <i>OCT3/4</i>                          | CTGGGTTGATCTCGGACCT                      | CCATCGGAGTTGCTCTCCA                      |
| qPCR                   | <i>NANOG</i>                           | TTTGTGGGCTGAAGAAACT                      | AGGGCTGTCCTGAATAAGCAG                    |
| qPCR                   | <i>SOX2</i>                            | GCCCGAGTGGAAACTTTTGTCTG                  | GGCAGCGTGTACTTATCCTTCT                   |
| qPCR                   | <i>AXIN2</i>                           | AGTCAGCAGAGGGACAGGAA                     | AGCTCTGAGCCTTCAGCATC                     |
| qPCR                   | <i>FOXD3</i>                           | GCATCTGCGAGTTCATCAGC                     | CGTTGAGTGAGAGGTTGTGG                     |
| qPCR                   | <i>SOX10</i>                           | CTCTGGAGGCTGCTGAA                        | TGGGCTGGTACTTGTAGTC                      |
| qPCR                   | <i>SNAI2</i>                           | CAGACCCTGGTTGCTTCAAG                     | GAGCCCTCAGATTTGACCTG                     |
| qPCR                   | <i>NR2F1</i>                           | CGAGTACAGCTGCCTCAAAG                     | TACTGGCTCCTCACGTA CT                     |
| qPCR                   | <i>PAX3</i>                            | AATACTCAAGGACGCGGTC                      | TTCTTCTCGCTTTCCTCTGC                     |
| qPCR                   | <i>PAX7</i>                            | TGACAGCTTCATGAATCCGG                     | GATGGAGAAGTCAGCCTGTG                     |
| qPCR                   | <i>TFAP2A</i>                          | GATCCTCGCAGGGACTACAG                     | TACCCGGGTCTTCTACATGC                     |
| qPCR                   | <i>ZIC2</i>                            | GTCCTACACGCATCCCAGTT                     | GCGATAAGGAGCTTGTGGTC                     |
| qPCR                   | <i>MSX1</i>                            | CTGCACCCTCCGCAAACACA                     | AGGCTGAGCGAGCTGGAGAA                     |
| qPCR                   | <i>MSX2</i>                            | CGGTCAAGTCGGAAAATTCA                     | GAGGAGCTGGGATGTGGTAA                     |
| qPCR                   | <i>FGFR2</i> E7 – E8 (NM_022970)       | ATCCAGTGGATCAAGCACGTGG                   | GGTCACATTGAACAGAGCCAGC                   |
| qPCR                   | <i>FGFR2</i> E7 – E8 (NM_000141)       | ATCCAGTGGATCAAGCACGTGG                   | CAGAACTGTCAACCATGCAGAGTG                 |
| qPCR                   | <i>DSP</i>                             | GCAGGATGTACTATTCTCGGC                    | CCTGGATGGTGTCTGGTTCT                     |
| qPCR                   | <i>TJP1</i>                            | CAACATACAGTGACGCTTCAACA                  | CACTATTGACGTTTCCCCACTC                   |
| qPCR                   | <i>CDH1</i>                            | CGAGAGCTACACGTTACCGG                     | GGGTGTCGAGGGAAAAATAGG                    |
| qPCR                   | <i>CDH2</i>                            | AGCCAACCTTAACTGAGGAGT                    | GGCAAGTTGATTGGAGGGATG                    |
| qPCR                   | <i>VIM</i>                             | AGTCCACTGAGTACCGGAGAC                    | CATTTACGCATCTGGCGTTC                     |
| qPCR                   | <i>ZEB1</i>                            | GATGATGAATGCGAGTCAGATGC                  | ACAGCAGTGTCTTGTGTGTGT                    |
| qPCR/RT-PCR            | <i>TCF7L2</i> E4 – E5                  | GCAGCACACATTACTCTGCG                     | TGCCTGGACATCAAGCAGTGG                    |
| qPCR/RT-PCR            | <i>TCF7L2</i> E3 – E5                  | GCCAAGAGGCAAGATGGAGG                     | TGCCTGGACATCAAGCAGTGG                    |

|        |                         |                         |                          |
|--------|-------------------------|-------------------------|--------------------------|
| RT-PCR | <i>UPRT</i> E2 – E3     | ACAGCCAGTAGAGGTGACTTC   | TGGAGTGGTCACCATGCATTC    |
| RT-PCR | <i>ZNF185</i> E14 – E16 | AGTTGAGTGATGGCAATGTGG   | GGATCTGCAGGTTGCTGAGC     |
| RT-PCR | <i>EML4</i> E3 – E5     | CAAGTCATACCAAGTGCTGTCTC | CGACAATTTATTACGGCTATCATC |
| RT-PCR | <i>MIB</i> E13 – E15    | CCAAGACCATGGATTGTGGATG  | CTTGCATATCTTGGAGCTGACG   |
| RT-PCR | <i>SUCO</i> E11 – E13   | TTCATGGTAGAGATGAGCGG    | TACCCTTATAAGGCTTAATGGAC  |

**S1 Table:** Applications and sequences of primers. E = exon, WT = wildtype, Mut = mutant.

| Target protein                                                                                              | Supplier, cat. number              | Dilution | Intracellular or cell surface |
|-------------------------------------------------------------------------------------------------------------|------------------------------------|----------|-------------------------------|
| OCT3/4                                                                                                      | BD Biosciences, 611202             | 1:100    | Intracellular                 |
| NANOG                                                                                                       | Cell Signalling Technologies, 4903 | 1:200    | Intracellular                 |
| SOX2                                                                                                        | Cell Signalling Technologies, 3579 | 1:400    | Intracellular                 |
| SSEA-1                                                                                                      | R&D Systems, MAB2155               | 1:400    | Cell surface                  |
| SSEA-2                                                                                                      | R&D Systems, MAB1434               | 1:200    | Cell surface                  |
| SSEA-4                                                                                                      | R&D Systems, MAB1435               | 1:200    | Cell surface                  |
| TRA-160                                                                                                     | Abcam, ab16288                     | 1:200    | Cell surface                  |
| TRA-181                                                                                                     | Abcam, ab16289                     | 1:200    | Cell surface                  |
| Rabbit IgG                                                                                                  | R&D systems, AB-105C               | 1:400    | NA                            |
| Mouse IgG (serotype control)                                                                                | R&D Systems, MAB002                | 1:200    | NA                            |
| Mouse IgM (serotype control)                                                                                | Abcam, ab18401                     | 1:200    | NA                            |
| Rat IgM (serotype control)                                                                                  | Abcam, ab35768                     | 1:200    | NA                            |
| Alexa-Fluor secondary anti-mouse, anti-rabbit and anti-rat antibodies (Alexa-Fluor-488 and Alexa-Fluor-594) | Invitrogen                         | 1:200    | NA                            |

**S2 Table:** Antibodies used for immunofluorescence staining.

| Auxiliary splicing factor gene | Function of auxiliary splicing factor                                              | iPSC RNA-Seq            |                       | iNCC RNA-Seq            |                       |
|--------------------------------|------------------------------------------------------------------------------------|-------------------------|-----------------------|-------------------------|-----------------------|
|                                |                                                                                    | Differential expression | Differential splicing | Differential expression | Differential splicing |
| <i>SRSF1</i>                   | Constitutive and alternative splicing activator, and has a role in EMT progression | No                      | No                    | No                      | No                    |
| <i>SRSF2</i>                   | Constitutive and alternative splicing activator                                    | No                      | No                    | No                      | No                    |
| <i>SRSF3</i>                   | Constitutive and alternative splicing activator, and has a role in EMT progression | No                      | No                    | No                      | No                    |
| <i>SRSF4</i>                   | Constitutive and alternative splicing activator                                    | No                      | No                    | No                      | No                    |
| <i>SRSF5</i>                   | Constitutive and alternative splicing activator                                    | No                      | No                    | No                      | No                    |
| <i>SRSF6</i>                   | Constitutive and alternative splicing activator                                    | No                      | No                    | No                      | No                    |
| <i>SRSF7</i>                   | Constitutive and alternative splicing activator                                    | No                      | No                    | No                      | No                    |
| <i>SRSF11</i>                  | Alternative splicing repressor                                                     | No                      | No                    | No                      | No                    |
| <i>SRSF9</i>                   | Constitutive and alternative splicing regulator                                    | No                      | No                    | No                      | No                    |
| <i>SRSF10</i>                  | General splicing repressor                                                         | No                      | No                    | No                      | No                    |

|                |                                                 |                                                          |    |                                                          |    |
|----------------|-------------------------------------------------|----------------------------------------------------------|----|----------------------------------------------------------|----|
| <i>TRA2A</i>   | Splicing activator                              | No                                                       | No | No                                                       | No |
| <i>TRA2B</i>   | Splicing activator                              | No                                                       | No | No                                                       | No |
| <i>RNPS1</i>   | Constitutive and alternative splicing regulator | No                                                       | No | No                                                       | No |
| <i>SRSF12</i>  | Negative regulator of alternative splicing      | No                                                       | No | No                                                       | No |
| <i>U2AF1</i>   | Constitutive splicing factor                    | Yes (expression higher in pooled controls than patients) | No | No                                                       | No |
| <i>U2AF2</i>   | Constitutive splicing factor                    | No                                                       | No | No                                                       | No |
| <i>SNRNP70</i> | Constitutive splicing factor                    | No                                                       | No | No                                                       | No |
| <i>AKAP17A</i> | Alternative splicing regulator                  | No                                                       | No | No                                                       | No |
| <i>SRSF8</i>   | Constitutive and alternative splicing regulator | No                                                       | No | Yes (expression higher in patients than pooled controls) | No |
| <i>ZRSR2</i>   | Splicing factor                                 | No                                                       | No | No                                                       | No |
| <i>RBM39</i>   | Alternative splicing regulator                  | No                                                       | No | No                                                       | No |
| <i>CLASRP</i>  | Alternative splicing regulator                  | No                                                       | No | No                                                       | No |
| <i>PNN</i>     | Alternative splicing regulator                  | No                                                       | No | No                                                       | No |
| <i>SCAF11</i>  | Splicing factor                                 | No                                                       | No | No                                                       | No |
| <i>ZRANB2</i>  | Alternative splicing regulator                  | No                                                       | No | No                                                       | No |

|               |                                                                                                        |    |    |                                                          |                                                                          |
|---------------|--------------------------------------------------------------------------------------------------------|----|----|----------------------------------------------------------|--------------------------------------------------------------------------|
| <i>SRRM1</i>  | Constitutive and alternative splicing co-activator                                                     | No | No | No                                                       | No                                                                       |
| <i>SRRM2</i>  | Constitutive and alternative splicing co-activator                                                     | No | No | Yes (expression higher in pooled controls than patients) | Yes (increased SE in patient compared to pooled controls)                |
| <i>ESRP-1</i> | Promotes epithelial cell-specific splicing pattern; downregulated during EMT                           | No | No | Yes (expression higher in patients than pooled controls) | No                                                                       |
| <i>ESRP-2</i> | Promotes epithelial cell-specific splicing pattern; downregulated during EMT                           | No | No | No                                                       | Yes (increased SE in patient compared to pooled controls)                |
| <i>RBFOX2</i> | Promotes mesenchymal splicing patterns for many transcripts that undergo AS during the EMT             | No | No | No                                                       | Yes (increased SE in patient compared to pooled controls and MXE events) |
| <i>RBM47</i>  | Regulates splicing of numerous transcripts that switch during EMT; expression downregulated during EMT | No | No | No                                                       | No                                                                       |
| <i>QKI</i>    | Broadly promotes mesenchymal                                                                           | No | No | No                                                       | No                                                                       |

|              | splicing patterns           |    |    |    |                                                           |
|--------------|-----------------------------|----|----|----|-----------------------------------------------------------|
| <i>MBNL1</i> | Implicated in AS during EMT | No | No | No | Yes (increased SE in patient compared to pooled controls) |
| <i>PTBP1</i> | Implicated in AS during EMT | No | No | No | No                                                        |

**S3 Table:** Differential expression and differential splicing of auxiliary and alternative splicing factors, including splicing factors important in the epithelial-to-mesenchymal transition (EMT), in patient iPSCs or iNCCs compared to pooled maternal and unrelated control (pooled control) iPSCs or iNCCs, as determined from RNA-Seq data. SE = skipped exon, MXE = mutually exclusive exons, AS = alternative splicing.

|                   | <b>MXE</b><br>80 | <b>RI</b><br>67 | <b>SE</b><br>882 | <b>A3SS</b><br>92 |
|-------------------|------------------|-----------------|------------------|-------------------|
| <b>A5SS</b><br>83 | 6                | 6               | 13               | 2                 |
| <b>MXE</b><br>80  |                  | 4               | 48               | 6                 |
| <b>RI</b><br>67   |                  |                 | 11               | 6                 |
| <b>SE</b><br>882  |                  |                 |                  | 18                |

**S4 Table:** Number of genes showing more than one form of alternative splicing events between pooled patient and pooled mother and unrelated control iPSCs obtained using rMATS. A3SS = alternative 3' splice site, A5SS = alternative 5'ss, MXE = mutually exclusive exons, RI =retained intron, SE = skipped exon.



| <b>Gene</b>       | <b>Number of types of mis-splicing</b> | <b>Classes of mis-splicing present</b> |
|-------------------|----------------------------------------|----------------------------------------|
| <i>SNHG14</i>     | 4                                      | MXE, RI, SE, A3SS                      |
| <i>AC026412.1</i> | 3                                      | A5SS, MXE, SE                          |
| <i>AC104257.1</i> | 3                                      | A5SS, MXE, SE                          |
| <i>AC239809.3</i> | 3                                      | MXE, SE, A3SS                          |
| <i>FOXP2</i>      | 3                                      | MXE, SE, A3SS                          |
| <i>HPN</i>        | 3                                      | A5SS, MXE, SE                          |
| <i>PCBP1-AS1</i>  | 3                                      | A5SS, MXE, SE                          |
| <i>SNHG17</i>     | 3                                      | A5SS, MXE, SE                          |
| <i>TNNT1</i>      | 3                                      | MXE, SE, A3SS                          |
| <i>ZDHHC4</i>     | 3                                      | A5SS, MXE, SE                          |
| <i>ABCC1</i>      | 2                                      | MXE, SE                                |
| <i>ADARB1</i>     | 2                                      | A5SS, SE                               |
| <i>AGAP4</i>      | 2                                      | MXE, SE                                |
| <i>ANAPC5</i>     | 2                                      | RI, A3SS                               |
| <i>ANKMY1</i>     | 2                                      | MXE, SE                                |
| <i>ARIH2</i>      | 2                                      | SE, A3SS                               |
| <i>ATXN2L</i>     | 2                                      | RI, A3SS                               |
| <i>AURKA</i>      | 2                                      | MXE, SE                                |
| <i>B3GNTL1</i>    | 2                                      | MXE, SE                                |
| <i>CARS2</i>      | 2                                      | A5SS, SE                               |
| <i>CCDC15</i>     | 2                                      | MXE, SE                                |
| <i>CCDC18-AS1</i> | 2                                      | MXE, SE                                |
| <i>CCDC30</i>     | 2                                      | MXE, SE                                |
| <i>CD44</i>       | 2                                      | SE, A3SS                               |
| <i>CFAP298</i>    | 2                                      | RI, SE                                 |
| <i>CHRD</i>       | 2                                      | A5SS, RI                               |
| <i>CLEC7A</i>     | 2                                      | A5SS, SE                               |
| <i>CNOT2</i>      | 2                                      | MXE, SE                                |
| <i>COA1</i>       | 2                                      | MXE, SE                                |
| <i>COPE</i>       | 2                                      | MXE, SE                                |
| <i>CPNE1</i>      | 2                                      | A5SS, A3SS                             |
| <i>DCXR</i>       | 2                                      | SE, A3SS                               |
| <i>DDR1</i>       | 2                                      | MXE, SE                                |
| <i>DDX11</i>      | 2                                      | RI, A3SS                               |
| <i>DHRS12</i>     | 2                                      | A5SS, A3SS                             |
| <i>DMAC2</i>      | 2                                      | RI, SE                                 |
| <i>DMPK</i>       | 2                                      | RI, SE                                 |

|                  |   |           |
|------------------|---|-----------|
| <i>DNAH14</i>    | 2 | MXE, SE   |
| <i>DNMT1</i>     | 2 | MXE, RI   |
| <i>DRAM2</i>     | 2 | MXE, SE   |
| <i>EPN2</i>      | 2 | SE, A3SS  |
| <i>ERN2</i>      | 2 | RI, SE    |
| <i>FMR1-AS1</i>  | 2 | A5SS, RI  |
| <i>HLA-A</i>     | 2 | MXE, RI   |
| <i>IDH3G</i>     | 2 | MXE, SE   |
| <i>LARP4</i>     | 2 | MXE, A3SS |
| <i>LINC01529</i> | 2 | RI, SE    |
| <i>LINC01535</i> | 2 | SE, A3SS  |
| <i>LPAR4</i>     | 2 | MXE, SE   |
| <i>LPP</i>       | 2 | MXE, SE   |
| <i>LTK</i>       | 2 | A5SS, RI  |
| <i>MARK3</i>     | 2 | MXE, SE   |
| <i>MIB1</i>      | 2 | MXE, SE   |
| <i>MLF1</i>      | 2 | MXE, SE   |
| <i>MLST8</i>     | 2 | RI, A3SS  |
| <i>MRPS15</i>    | 2 | MXE, SE   |
| <i>MRVI1</i>     | 2 | SE, A3SS  |
| <i>MTX2</i>      | 2 | MXE, SE   |
| <i>MYEOV</i>     | 2 | RI, SE    |
| <i>MYO7A</i>     | 2 | RI, SE    |
| <i>NDUFA3</i>    | 2 | MXE, SE   |
| <i>NEPRO</i>     | 2 | A5SS, SE  |
| <i>NMRK1</i>     | 2 | RI, SE    |
| <i>PCAT1</i>     | 2 | MXE, SE   |
| <i>PDE2A</i>     | 2 | MXE, SE   |
| <i>PIGQ</i>      | 2 | SE, A3SS  |
| <i>PIGT</i>      | 2 | SE, A3SS  |
| <i>PLD3</i>      | 2 | A5SS, SE  |
| <i>PRMT5</i>     | 2 | A5SS, RI  |
| <i>PSMA4</i>     | 2 | RI, A3SS  |
| <i>PSMD13</i>    | 2 | SE, A3SS  |
| <i>PSPH</i>      | 2 | SE, A3SS  |
| <i>RPL17</i>     | 2 | MXE, RI   |
| <i>SATB1-AS1</i> | 2 | MXE, SE   |
| <i>SCART1</i>    | 2 | A5SS, RI  |
| <i>SEC24C</i>    | 2 | MXE, SE   |
| <i>SLC14A1</i>   | 2 | MXE, A3SS |
| <i>SLC30A6</i>   | 2 | MXE, SE   |
| <i>SLC38A9</i>   | 2 | SE, A3SS  |

|                   |   |          |
|-------------------|---|----------|
| <i>SLC3A2</i>     | 2 | MXE, SE  |
| <i>SRD5A3-AS1</i> | 2 | MXE, SE  |
| <i>SS18</i>       | 2 | SE, A3SS |
| <i>ST6GALNAC6</i> | 2 | A5SS, SE |
| <i>STARD5</i>     | 2 | RI, SE   |
| <i>TMEM126B</i>   | 2 | MXE, SE  |
| <i>TMEM14B</i>    | 2 | MXE, SE  |
| <i>TSC1</i>       | 2 | SE, A3SS |
| <i>TSFM</i>       | 2 | A5SS, RI |
| <i>TSPAN17</i>    | 2 | A5SS, SE |
| <i>TSSC2</i>      | 2 | MXE, SE  |
| <i>TULP3</i>      | 2 | MXE, SE  |
| <i>TVP23A</i>     | 2 | MXE, SE  |
| <i>WDR97</i>      | 2 | SE, A3SS |
| <i>ZNF185</i>     | 2 | MXE, SE  |
| <i>ZNF232</i>     | 2 | MXE, SE  |
| <i>ZSCAN10</i>    | 2 | MXE, SE  |
| <i>ZSWIM7</i>     | 2 | RI, SE   |

**S5 Table:** Identities of genes showing multiple classes of significantly altered splicing events in pooled patient iPSCs compared to pooled mother and unrelated control iPSCs. A5SS = alternative 5' splice site, A3SS = alternative 3' splice site, MXE = mutually exclusive exons, RI = retained intron, SE = skipped exon.

|                    |                    |                   |                  |                   |
|--------------------|--------------------|-------------------|------------------|-------------------|
|                    | <b>A5SS</b><br>194 | <b>MXE</b><br>155 | <b>RI</b><br>172 | <b>SE</b><br>1619 |
| <b>A3SS</b><br>155 | 7                  | 5                 | 10               | 40                |
| <b>A5SS</b><br>194 |                    | 9                 | 12               | 65                |
| <b>MXE</b><br>155  |                    |                   | 7                | 98                |
| <b>RI</b><br>172   |                    |                   |                  | 43                |

**S6 Table:** Number of genes showing more than one form of alternative splicing events between pooled patient iNCCs and pooled mother and unrelated control iNCCs obtained using rMATS. A3SS = alternative 3' splice site, A5SS = alternative 5'ss, MXE = mutually exclusive exons, RI = retained intron, SE = skipped exon.

| <b>Gene</b>       | <b>Number of different types of mis-splicing</b> | <b>Types of mis-splicing present</b> |
|-------------------|--------------------------------------------------|--------------------------------------|
| <i>COMMD4</i>     | 4                                                | A5SS, MXE, RI, SE                    |
| <i>ADAM15</i>     | 3                                                | A5SS, MXE, SE                        |
| <i>AKAP8L</i>     | 3                                                | A5SS, RI, SE                         |
| <i>CCHCR1</i>     | 3                                                | A3SS, A5SS, SE                       |
| <i>CPNE1</i>      | 3                                                | A3SS, A5SS, SE                       |
| <i>CTNND1</i>     | 3                                                | A5SS, MXE, SE                        |
| <i>DMTF1</i>      | 3                                                | A3SS, MXE, SE                        |
| <i>EPB41</i>      | 3                                                | A5SS, MXE, SE                        |
| <i>EPB41L3</i>    | 3                                                | MXE, RI, SE                          |
| <i>FAM122C</i>    | 3                                                | MXE, RI, SE                          |
| <i>GGT1</i>       | 3                                                | A3SS, RI, SE                         |
| <i>HDAC7</i>      | 3                                                | A5SS, RI, SE                         |
| <i>LUCAT1</i>     | 3                                                | A5SS, RI, SE                         |
| <i>NAP1L4</i>     | 3                                                | A3SS, MXE, SE                        |
| <i>PCBP1-AS1</i>  | 3                                                | A3SS, MXE, SE                        |
| <i>PFKM</i>       | 3                                                | A5SS, MXE, SE                        |
| <i>PLD3</i>       | 3                                                | A3SS, A5SS, SE                       |
| <i>RHOT2</i>      | 3                                                | A5SS, RI, SE                         |
| <i>RPS24</i>      | 3                                                | MXE, RI, SE                          |
| <i>SGCE</i>       | 3                                                | A3SS, RI, SE                         |
| <i>SNHG14</i>     | 3                                                | A3SS, RI, SE                         |
| <i>SNHG17</i>     | 3                                                | A5SS, MXE, SE                        |
| <i>SPG7</i>       | 3                                                | A5SS, RI, SE                         |
| <i>SUGP2</i>      | 3                                                | A3SS, RI, SE                         |
| <i>TPM2</i>       | 3                                                | MXE, RI, SE                          |
| <i>ZHX3</i>       | 3                                                | A5SS, MXE, SE                        |
| <i>ZSWIM7</i>     | 3                                                | MXE, RI, SE                          |
| <i>ABCB8</i>      | 2                                                | MXE, SE                              |
| <i>AC002074.1</i> | 2                                                | MXE, SE                              |
| <i>AC012651.1</i> | 2                                                | RI, SE                               |
| <i>AC026412.1</i> | 2                                                | A5SS, SE                             |
| <i>AC068831.7</i> | 2                                                | A3SS, SE                             |
| <i>ACCS</i>       | 2                                                | A5SS, SE                             |
| <i>ACTN1</i>      | 2                                                | MXE, SE                              |
| <i>ACYP1</i>      | 2                                                | MXE, SE                              |
| <i>ADGRB2</i>     | 2                                                | MXE, SE                              |
| <i>AFDN</i>       | 2                                                | A3SS, SE                             |
| <i>AGRN</i>       | 2                                                | MXE, SE                              |
| <i>AKAP3</i>      | 2                                                | A5SS, SE                             |

|                 |   |            |
|-----------------|---|------------|
| <i>AMHR2</i>    | 2 | A5SS, RI   |
| <i>ANK2</i>     | 2 | A3SS, SE   |
| <i>ANKDD1A</i>  | 2 | A5SS, SE   |
| <i>ANKZF1</i>   | 2 | A5SS, RI   |
| <i>AP1G1</i>    | 2 | RI, SE     |
| <i>AP1G2</i>    | 2 | A3SS, SE   |
| <i>APBB3</i>    | 2 | A3SS, SE   |
| <i>ARHGEF40</i> | 2 | RI, SE     |
| <i>ARHGEF9</i>  | 2 | MXE, SE    |
| <i>ASL</i>      | 2 | MXE, SE    |
| <i>ATP13A2</i>  | 2 | A3SS, A5SS |
| <i>ATXN2L</i>   | 2 | A3SS, RI   |
| <i>AURKA</i>    | 2 | MXE, SE    |
| <i>BCS1L</i>    | 2 | A5SS, SE   |
| <i>BECN1</i>    | 2 | A5SS, SE   |
| <i>BRCA1</i>    | 2 | A5SS, SE   |
| <i>CACNA1E</i>  | 2 | MXE, SE    |
| <i>CAPN7</i>    | 2 | MXE, SE    |
| <i>CARF</i>     | 2 | A5SS, MXE  |
| <i>CCDC15</i>   | 2 | MXE, SE    |
| <i>CCDC173</i>  | 2 | A3SS, SE   |
| <i>CCNB1IP1</i> | 2 | MXE, SE    |
| <i>CCNT1</i>    | 2 | MXE, SE    |
| <i>CD44</i>     | 2 | A3SS, SE   |
| <i>CDK10</i>    | 2 | RI, SE     |
| <i>CDK5RAP3</i> | 2 | A5SS, RI   |
| <i>CERS5</i>    | 2 | A3SS, A5SS |
| <i>CHD2</i>     | 2 | MXE, SE    |
| <i>CIB2</i>     | 2 | A3SS, SE   |
| <i>CLCN6</i>    | 2 | A3SS, SE   |
| <i>CNOT2</i>    | 2 | MXE, SE    |
| <i>COA1</i>     | 2 | MXE, SE    |
| <i>COL9A3</i>   | 2 | A3SS, SE   |
| <i>CPAMD8</i>   | 2 | A5SS, SE   |
| <i>CRELD1</i>   | 2 | A5SS, RI   |
| <i>CREM</i>     | 2 | MXE, SE    |
| <i>CROCCP2</i>  | 2 | A3SS, SE   |
| <i>CSNK1D</i>   | 2 | RI, SE     |
| <i>CYP3A5</i>   | 2 | A3SS, SE   |
| <i>DCUN1D4</i>  | 2 | A5SS, SE   |
| <i>DEDD2</i>    | 2 | MXE, SE    |
| <i>DGLUCY</i>   | 2 | A5SS, SE   |

|                  |   |           |
|------------------|---|-----------|
| <i>DHRS4L2</i>   | 2 | RI, SE    |
| <i>DMAC2</i>     | 2 | RI, SE    |
| <i>DMKN</i>      | 2 | RI, SE    |
| <i>DNAH14</i>    | 2 | MXE, SE   |
| <i>DNAJC10</i>   | 2 | A3SS, MXE |
| <i>DNM1</i>      | 2 | A3SS, SE  |
| <i>DNM2</i>      | 2 | MXE, SE   |
| <i>DNMT1</i>     | 2 | MXE, RI   |
| <i>DPY19L3</i>   | 2 | RI, SE    |
| <i>DRAM2</i>     | 2 | MXE, SE   |
| <i>ECSIT</i>     | 2 | A5SS, SE  |
| <i>EFCAB12</i>   | 2 | RI, SE    |
| <i>EFNA1</i>     | 2 | A3SS, SE  |
| <i>EIF4A2</i>    | 2 | MXE, SE   |
| <i>ELMOD3</i>    | 2 | MXE, SE   |
| <i>ELP2</i>      | 2 | MXE, SE   |
| <i>EML4</i>      | 2 | MXE, SE   |
| <i>EXOSC8</i>    | 2 | RI, SE    |
| <i>FAM135A</i>   | 2 | A3SS, SE  |
| <i>FAM219B</i>   | 2 | RI, SE    |
| <i>FAM241B</i>   | 2 | RI, SE    |
| <i>FAM66C</i>    | 2 | A5SS, SE  |
| <i>FES</i>       | 2 | A5SS, SE  |
| <i>FGFR1</i>     | 2 | MXE, SE   |
| <i>FGFR2</i>     | 2 | MXE, SE   |
| <i>FGFR3</i>     | 2 | MXE, SE   |
| <i>GATAD2A</i>   | 2 | A3SS, SE  |
| <i>GORASP1</i>   | 2 | A3SS, SE  |
| <i>GTF2E2</i>    | 2 | MXE, SE   |
| <i>HACL1</i>     | 2 | MXE, SE   |
| <i>HDAC2-AS2</i> | 2 | A5SS, SE  |
| <i>HERC2P9</i>   | 2 | A5SS, SE  |
| <i>HLCS</i>      | 2 | MXE, SE   |
| <i>HNRNPH1</i>   | 2 | A5SS, RI  |
| <i>HOOK3</i>     | 2 | MXE, SE   |
| <i>IMMP1L</i>    | 2 | A5SS, SE  |
| <i>ING4</i>      | 2 | A5SS, SE  |
| <i>INTS6L</i>    | 2 | RI, SE    |
| <i>IRF3</i>      | 2 | A5SS, SE  |
| <i>IVNS1ABP</i>  | 2 | MXE, SE   |
| <i>KIF23</i>     | 2 | MXE, SE   |
| <i>KLC1</i>      | 2 | A5SS, SE  |

|                  |   |            |
|------------------|---|------------|
| <i>L3MBTL2</i>   | 2 | A5SS, SE   |
| <i>LARGE2</i>    | 2 | A3SS, RI   |
| <i>LIMS2</i>     | 2 | RI, SE     |
| <i>LINC01198</i> | 2 | A5SS, SE   |
| <i>LPP</i>       | 2 | MXE, SE    |
| <i>LRRC77P</i>   | 2 | MXE, SE    |
| <i>LYPD6B</i>    | 2 | MXE, SE    |
| <i>MAMDC4</i>    | 2 | RI, SE     |
| <i>MAP4K4</i>    | 2 | A5SS, SE   |
| <i>MATR3</i>     | 2 | MXE, SE    |
| <i>METTL23</i>   | 2 | A5SS, SE   |
| <i>MIB1</i>      | 2 | MXE, SE    |
| <i>MITD1</i>     | 2 | RI, SE     |
| <i>MLH1</i>      | 2 | A3SS, SE   |
| <i>MLST8</i>     | 2 | A3SS, RI   |
| <i>MLXIPL</i>    | 2 | A3SS, A5SS |
| <i>MRPS15</i>    | 2 | MXE, SE    |
| <i>MSRB3</i>     | 2 | MXE, SE    |
| <i>MTX2</i>      | 2 | MXE, SE    |
| <i>MUS81</i>     | 2 | A3SS, RI   |
| <i>MYH10</i>     | 2 | MXE, SE    |
| <i>NAP1L1</i>    | 2 | MXE, SE    |
| <i>NBN</i>       | 2 | A3SS, SE   |
| <i>NEMP1</i>     | 2 | A5SS, SE   |
| <i>NGLY1</i>     | 2 | MXE, SE    |
| <i>NT5C2</i>     | 2 | A5SS, SE   |
| <i>OGT</i>       | 2 | A3SS, SE   |
| <i>PC</i>        | 2 | A5SS, SE   |
| <i>PCAT1</i>     | 2 | MXE, SE    |
| <i>PHPT1</i>     | 2 | RI, SE     |
| <i>PHYKPL</i>    | 2 | A3SS, SE   |
| <i>PICALM</i>    | 2 | MXE, SE    |
| <i>PIGG</i>      | 2 | A5SS, SE   |
| <i>PLAA</i>      | 2 | MXE, SE    |
| <i>PNISR</i>     | 2 | A5SS, SE   |
| <i>POLR2G</i>    | 2 | A5SS, SE   |
| <i>PPP1R12C</i>  | 2 | RI, SE     |
| <i>PRMT7</i>     | 2 | MXE, SE    |
| <i>PRPSAP2</i>   | 2 | MXE, SE    |
| <i>PTCH1</i>     | 2 | A5SS, SE   |
| <i>PTK2</i>      | 2 | A5SS, SE   |
| <i>PUS1</i>      | 2 | MXE, SE    |



|                   |   |           |
|-------------------|---|-----------|
| <i>PVT1</i>       | 2 | A5SS, SE  |
| <i>PWRN1</i>      | 2 | MXE, SE   |
| <i>RAB27A</i>     | 2 | A5SS, SE  |
| <i>RBFOX1</i>     | 2 | A5SS, SE  |
| <i>RBFOX2</i>     | 2 | MXE, SE   |
| <i>RHOC</i>       | 2 | A5SS, SE  |
| <i>RHOT1</i>      | 2 | MXE, SE   |
| <i>RIPOR1</i>     | 2 | RI, SE    |
| <i>RNF167</i>     | 2 | RI, SE    |
| <i>RNF181</i>     | 2 | A3SS, SE  |
| <i>RPL17</i>      | 2 | RI, SE    |
| <i>RPRD1A</i>     | 2 | MXE, SE   |
| <i>RPS9</i>       | 2 | RI, SE    |
| <i>RSRP1</i>      | 2 | RI, SE    |
| <i>SAP30BP</i>    | 2 | RI, SE    |
| <i>SCARB1</i>     | 2 | RI, SE    |
| <i>SEC31A</i>     | 2 | MXE, SE   |
| <i>SEPT2</i>      | 2 | A5SS, MXE |
| <i>SETD5</i>      | 2 | MXE, SE   |
| <i>SGO1</i>       | 2 | A5SS, SE  |
| <i>SH2B1</i>      | 2 | A5SS, SE  |
| <i>SH3D19</i>     | 2 | MXE, SE   |
| <i>SH3YL1</i>     | 2 | A3SS, SE  |
| <i>SLC25A19</i>   | 2 | A5SS, SE  |
| <i>SLC3A2</i>     | 2 | MXE, SE   |
| <i>SLC50A1</i>    | 2 | A5SS, SE  |
| <i>SMG7</i>       | 2 | MXE, SE   |
| <i>SMPD4</i>      | 2 | A5SS, SE  |
| <i>SMUG1</i>      | 2 | MXE, SE   |
| <i>SNTG2</i>      | 2 | MXE, SE   |
| <i>SPTY2D10S</i>  | 2 | A5SS, SE  |
| <i>SS18</i>       | 2 | A3SS, SE  |
| <i>ST3GAL1</i>    | 2 | MXE, SE   |
| <i>ST6GALNAC6</i> | 2 | A5SS, SE  |
| <i>STK33</i>      | 2 | A5SS, SE  |
| <i>STRA6LP</i>    | 2 | A5SS, RI  |
| <i>SULF2</i>      | 2 | RI, SE    |
| <i>SUN1</i>       | 2 | MXE, SE   |
| <i>TAF1</i>       | 2 | A5SS, SE  |
| <i>TANGO2</i>     | 2 | MXE, SE   |
| <i>TBC1D1</i>     | 2 | MXE, SE   |
| <i>TCTN1</i>      | 2 | A3SS, SE  |

|                          |   |            |
|--------------------------|---|------------|
| <i>TIAL1</i>             | 2 | A3SS, SE   |
| <i>TLE4</i>              | 2 | MXE, SE    |
| <i>TM7SF3</i>            | 2 | MXE, SE    |
| <i>TMEM126B</i>          | 2 | MXE, SE    |
| <i>TMEM134</i>           | 2 | A3SS, A5SS |
| <i>TMEM139</i>           | 2 | A3SS, SE   |
| <i>TMEM191C</i>          | 2 | A3SS, RI   |
| <i>TMEM91</i>            | 2 | A3SS, RI   |
| <i>TNNT3</i>             | 2 | A3SS, SE   |
| <i>TNRC6A</i>            | 2 | MXE, SE    |
| <i>TPD52L2</i>           | 2 | MXE, SE    |
| <i>TRMT1</i>             | 2 | A5SS, SE   |
| <i>TRMU</i>              | 2 | A3SS, SE   |
| <i>TTN-AS1</i>           | 2 | MXE, SE    |
| <i>TVP23C-<br/>CDRT4</i> | 2 | MXE, SE    |
| <i>UBE2F</i>             | 2 | MXE, SE    |
| <i>UBE2V1</i>            | 2 | A5SS, SE   |
| <i>UNC80</i>             | 2 | A5SS, SE   |
| <i>VPS13B</i>            | 2 | MXE, SE    |
| <i>VPS29</i>             | 2 | MXE, SE    |
| <i>WDR27</i>             | 2 | MXE, SE    |
| <i>ZBED3-AS1</i>         | 2 | MXE, SE    |
| <i>ZBTB80S</i>           | 2 | MXE, SE    |
| <i>ZFAND4</i>            | 2 | A5SS, SE   |
| <i>ZMAT1</i>             | 2 | A3SS, SE   |
| <i>ZNF10</i>             | 2 | RI, SE     |
| <i>ZNF107</i>            | 2 | MXE, SE    |
| <i>ZNF185</i>            | 2 | MXE, SE    |
| <i>ZNF266</i>            | 2 | A5SS, SE   |
| <i>ZNF561</i>            | 2 | MXE, SE    |
| <i>ZNF692</i>            | 2 | A5SS, SE   |
| <i>ZWILCH</i>            | 2 | A3SS, MXE  |

**S7 Table:** Identities of genes showing multiple classes of significantly altered splicing events in pooled patient iNCCs compared to pooled mother and unrelated control iNCCs. A5SS = alternative 5' splice site, A3SS = alternative 3' splice site, MXE = mutually exclusive exons, RI = retained intron, SE = skipped exon.
